# Supplementary material for: All-Atom Molecular Dynamics Simulations Indicated the Involvement of a Conserved Polar Signaling Channel in the Activation Mechanism of the Type I Cannabinoid Receptor
Source: MDPI journal article supplement (doi:10.3390/ijms24044232), 2023-02-20
Supplement: s1 [file s1]

# **All-Atom Molecular Dynamics Simulations Indicated the Involvement of a Conserved Polar Signaling Channel in the Activation Mechanism of the Type I Cannabinoid Receptor**

*Arijit Sarkar<sup>1,2</sup>, Argha Mitra<sup>1,2</sup>, Attila Borics<sup>1,\*</sup>.*

<sup>1</sup>Laboratory of Chemical Biology, Institute of Biochemistry, Biological Research Centre, Szeged, 62. Temesvári krt., Szeged, Hungary, H-6726.

<sup>2</sup>Theoretical Medicine Doctoral School, Faculty of Medicine, University of Szeged, 97. Tisza L. krt., Szeged, Hungary, H-6722.

**\*Corresponding Author**

Email: borics.attila@brc.hu, Phone: +36 62 599 600 ext. 430.

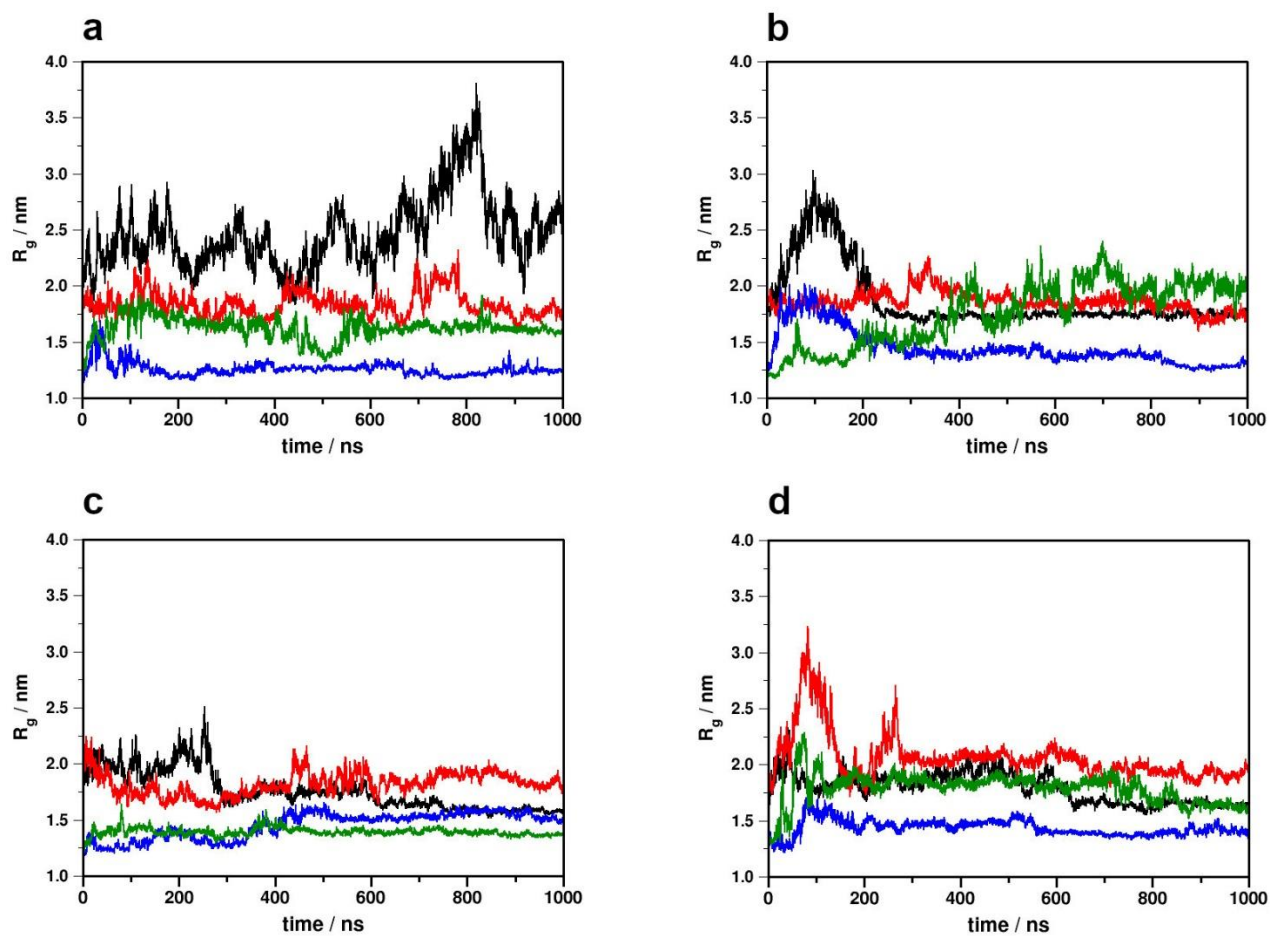

**Figure S1.** The evolution of radii of gyration of the N- and C-terminal domains of the CB1 receptor during production simulations. (a) active CB1 –  $G_i$  protein complex; (b) active CB1 –  $\beta$ -arrestin-2 complex; (c) inactive CB1 –  $G_i$  protein complex; (d) inactive CB1 –  $\beta$ -arrestin-2 complex. Black: N-terminal, 1<sup>st</sup> replica; red: N-terminal, 2<sup>nd</sup> replica; blue: C-terminal, 1<sup>st</sup> replica, green: C-terminal, 2<sup>nd</sup> replica.

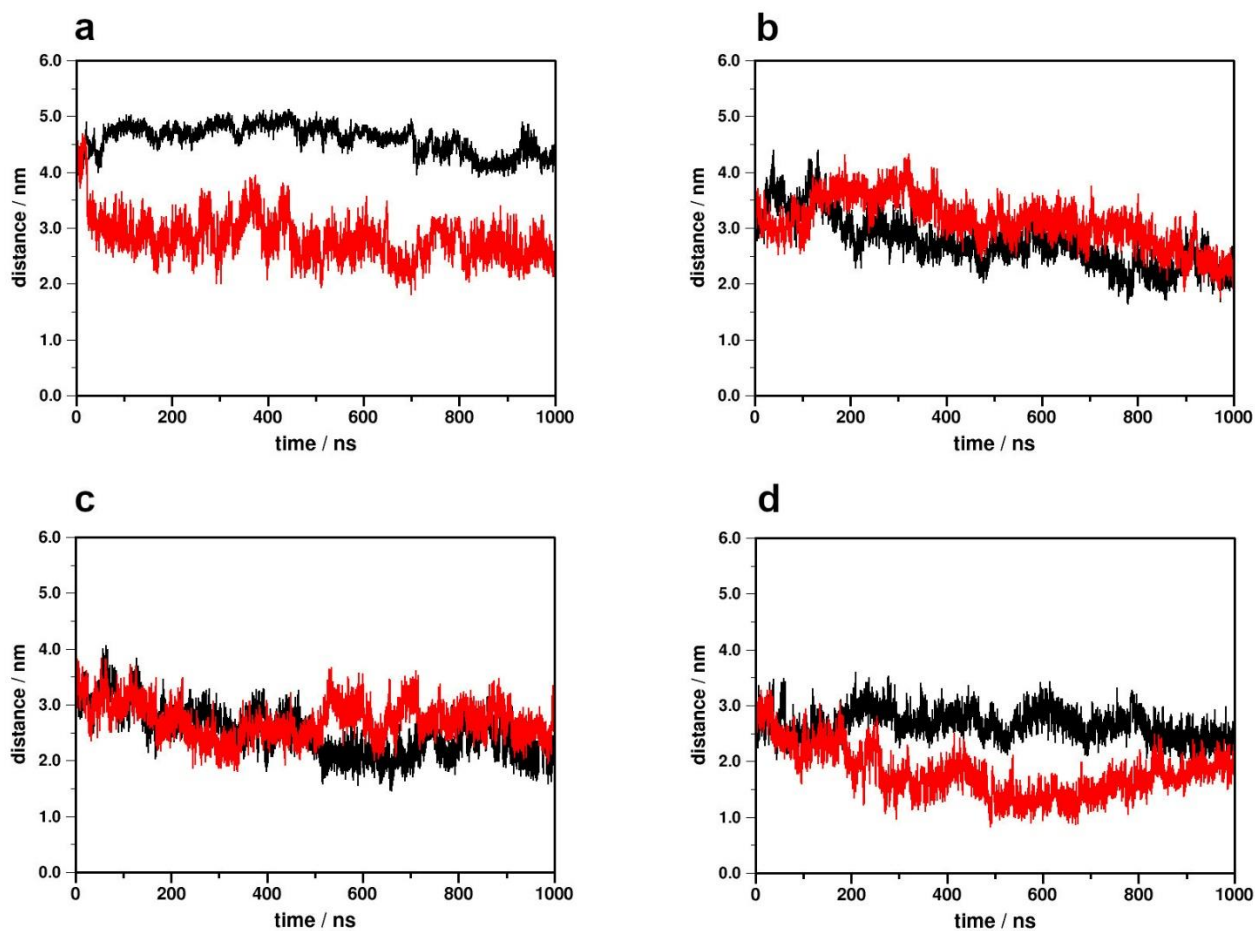

**Figure S2.** Minimum distance between the N- and C-terminal domains (and their periodic images) of the CB1 receptor during production simulations. (a) active CB1 –  $G_i$  protein complex; (b) active CB1 –  $\beta$ -arrestin-2 complex; (c) inactive CB1 –  $G_i$  protein complex; (d) inactive CB1 –  $\beta$ -arrestin-2 complex. Black 1<sup>st</sup> replica; red: 2<sup>nd</sup> replica.

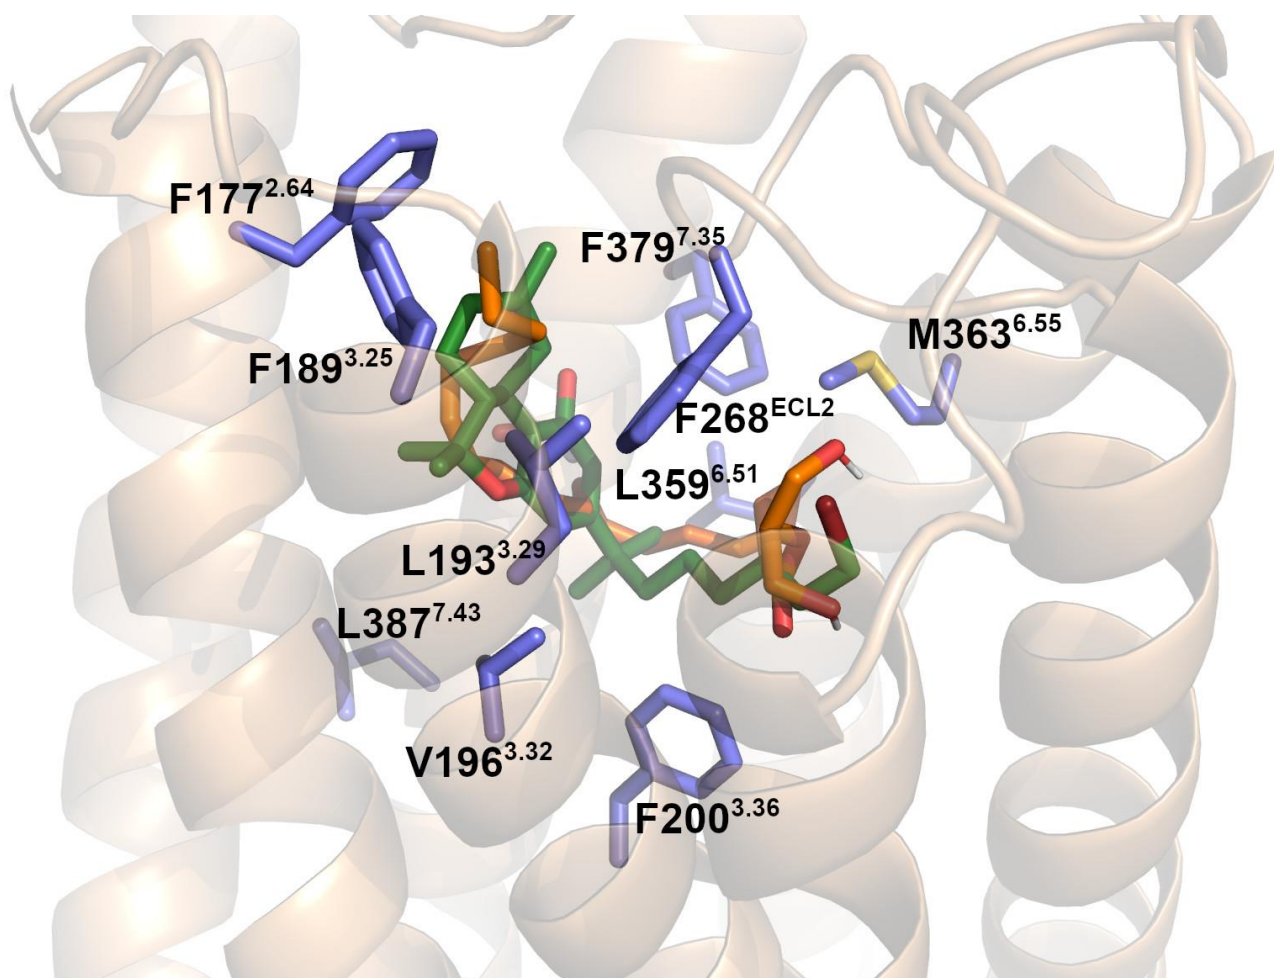

**Figure S3.** Comparison of the constructed orientation of 2-AG (orange), obtained from blind docking, to the crystallographic structure of AM11542 (green, pdb code: 5XRA) in the orthosteric binding pocket of the CB1 receptor. Amino acid side chains in contact with AM11542 in the experimental structure are shown as slate sticks and labeled.

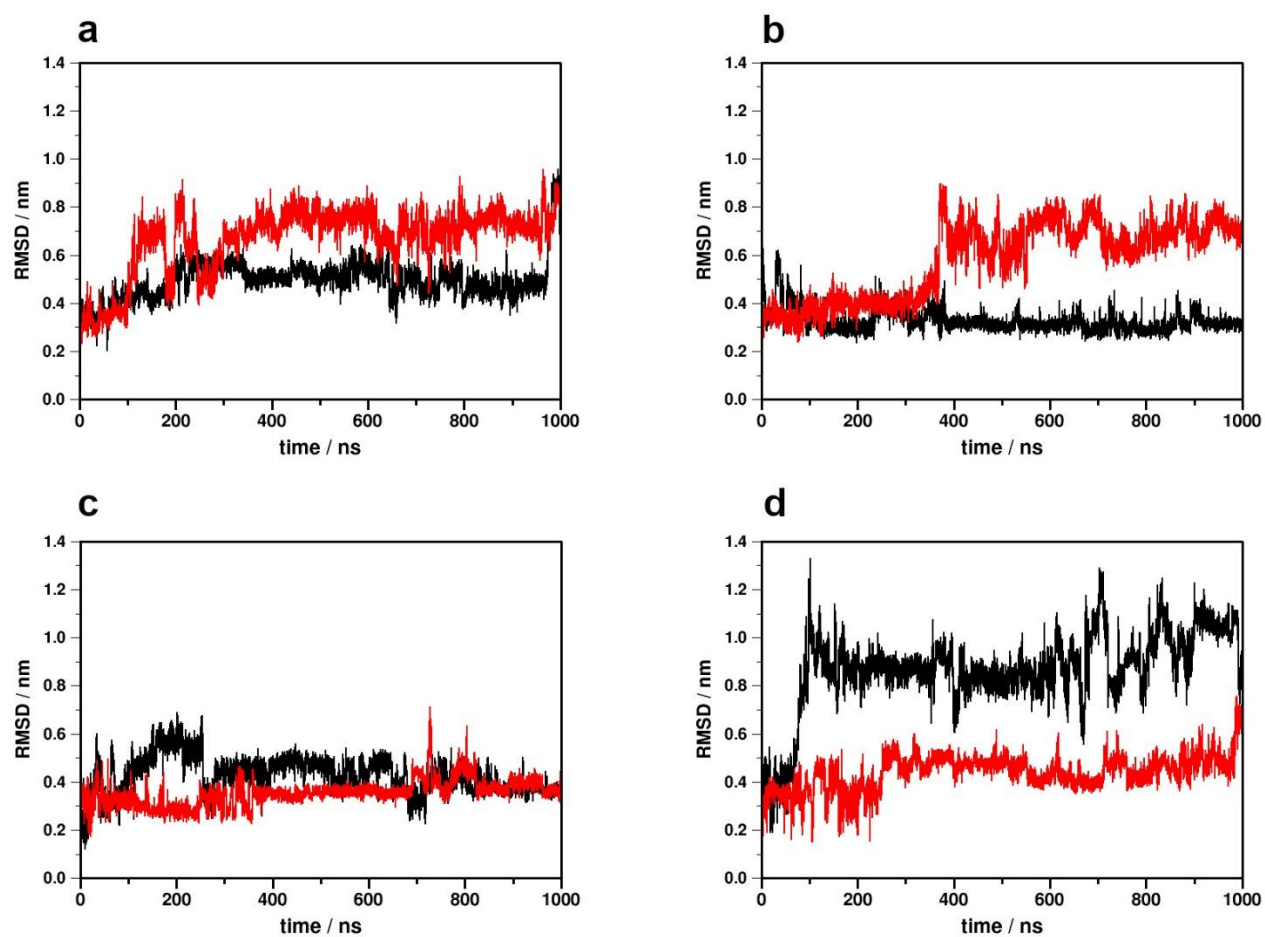

**Figure S4.** Disposition of 2-AG from its initial conformation and orientation during simulations. (a) active CB1 –  $G_i$  protein complex; (b) active CB1 –  $\beta$ -arrestin-2 complex; (c) inactive CB1 –  $G_i$  protein complex; (d) inactive CB1 –  $\beta$ -arrestin-2 complex. Black 1<sup>st</sup> replica; red: 2<sup>nd</sup> replica.

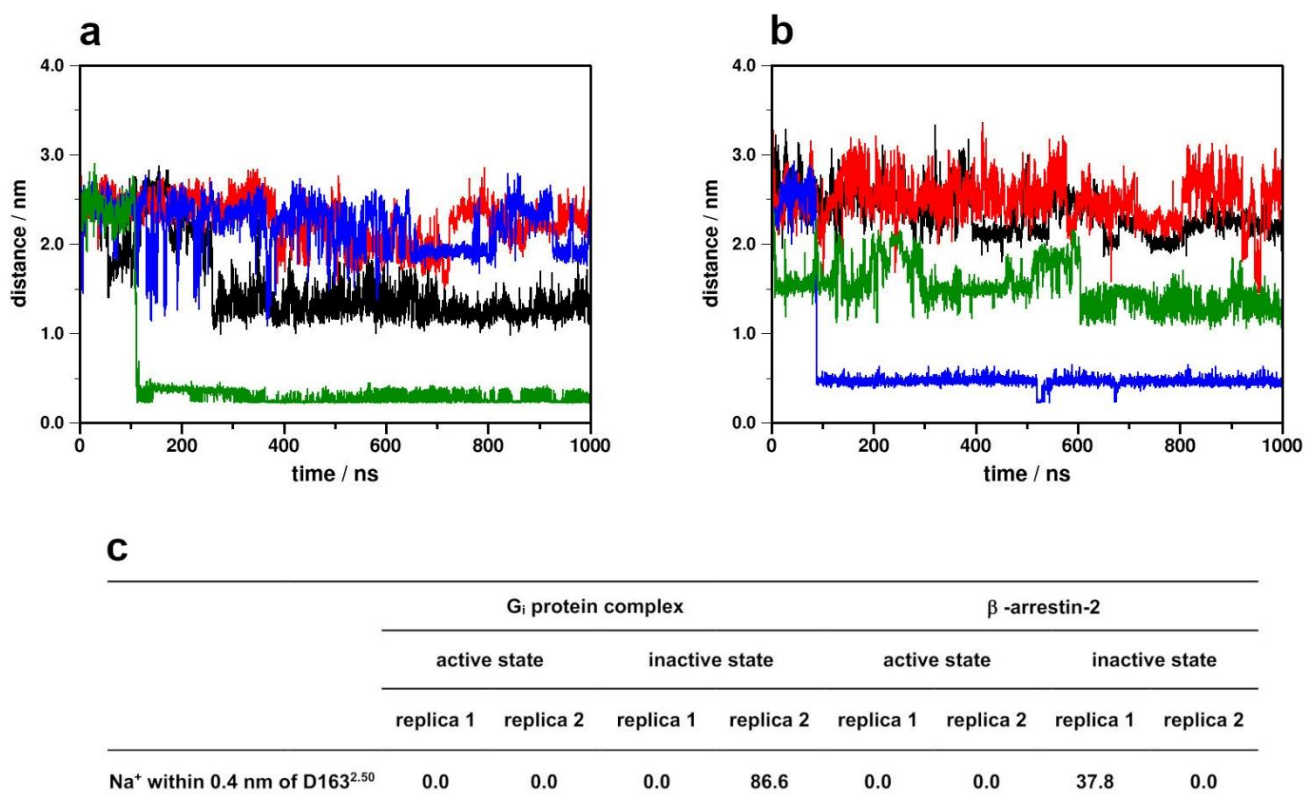

**Figure S5.** Minimum distance between Na<sup>+</sup> ions and D163<sup>2.50</sup> of the allosteric binding pocket of the CB1 – G<sub>i</sub> protein (a) and CB1 - β-arrestin-2 complexes (b). Black: active, 1<sup>st</sup> replica; red: active 2<sup>nd</sup> replica; blue: inactive, 1<sup>st</sup> replica; green: inactive 2<sup>nd</sup> replica. (c) The frequency of Na<sup>+</sup> present in the allosteric site during simulations.

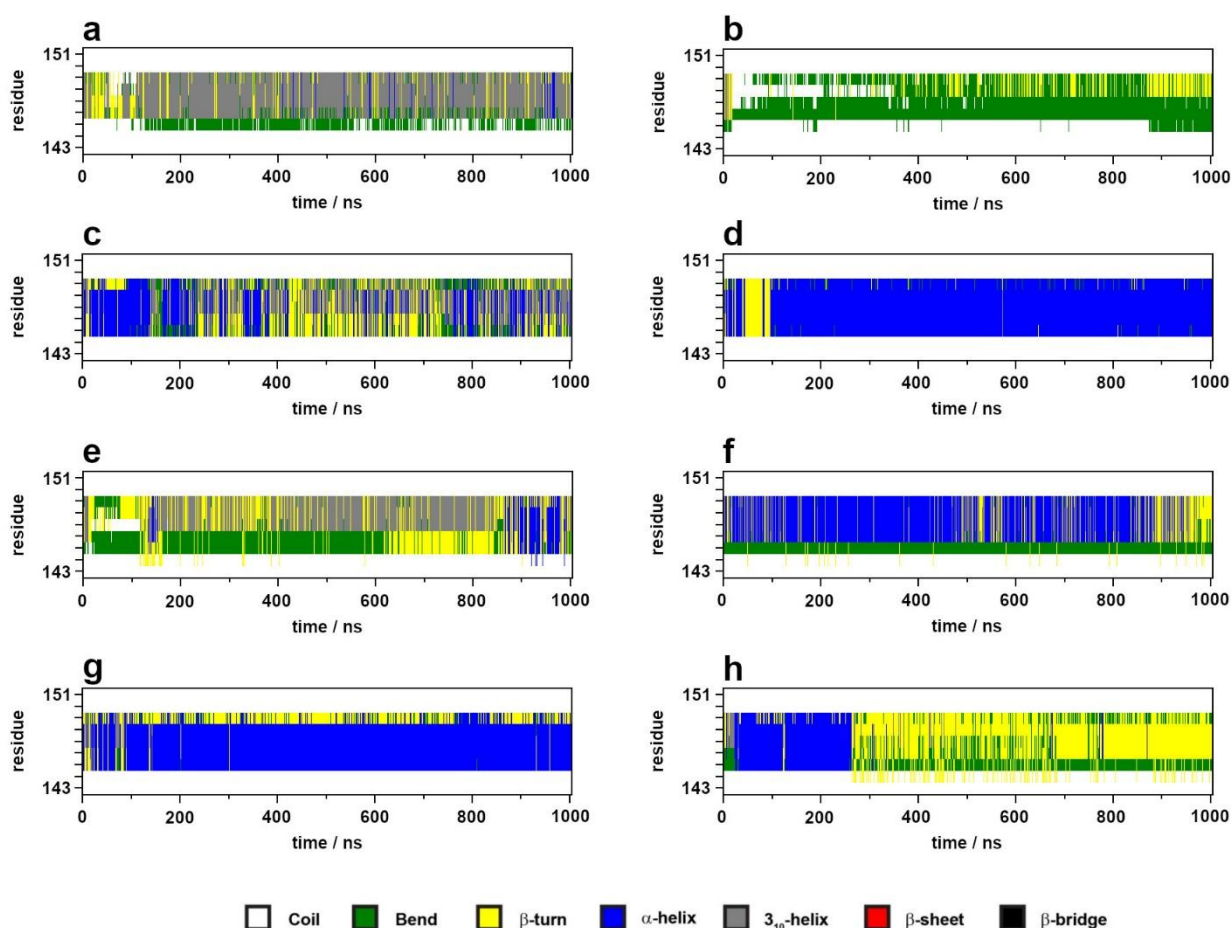

**Figure S6.** Evolution of the secondary structure of ICL1 during simulations. (a) active CB1 –  $G_i$  protein complex, 1<sup>st</sup> replica; (b) active CB1 –  $G_i$  protein complex, 2<sup>nd</sup> replica; (c) inactive CB1 –  $G_i$  protein complex, 1<sup>st</sup> replica; (d) inactive CB1 –  $G_i$  protein complex, 2<sup>nd</sup> replica; (e) active CB1 –  $\beta$ -arrestin-2 complex, 1<sup>st</sup> replica; (f) active CB1 –  $\beta$ -arrestin-2 complex, 2<sup>nd</sup> replica; (g) inactive CB1 –  $\beta$ -arrestin-2 complex, 1<sup>st</sup> replica; (h) inactive CB1 –  $\beta$ -arrestin-2 complex, 2<sup>nd</sup> replica.



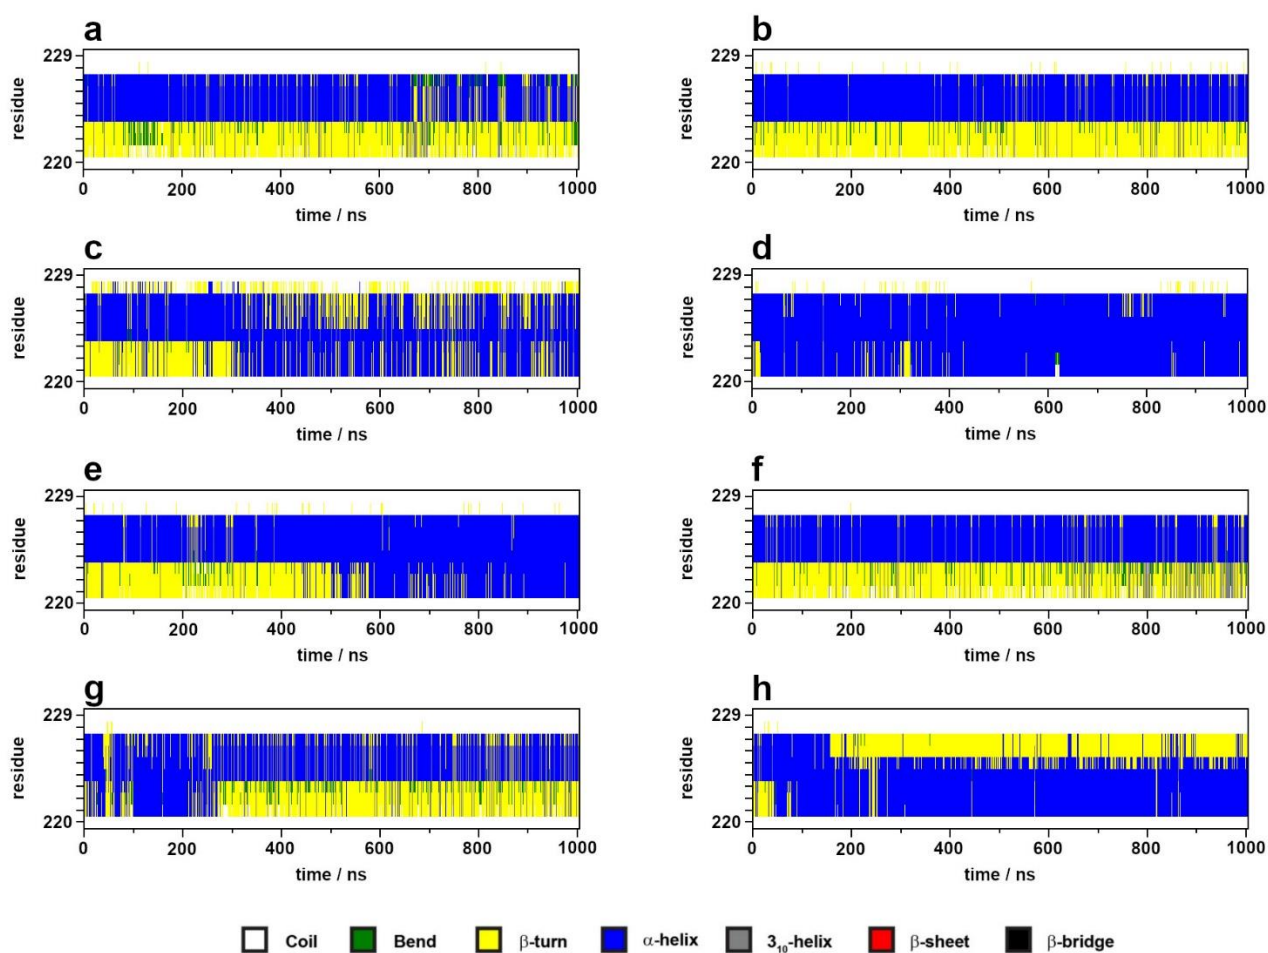

**Figure S7.** Evolution of the secondary structure of ICL2 during simulations. (a) active CB1 – G<sub>i</sub> protein complex, 1<sup>st</sup> replica; (b) active CB1 – G<sub>i</sub> protein complex, 2<sup>nd</sup> replica; (c) inactive CB1 – G<sub>i</sub> protein complex, 1<sup>st</sup> replica; (d) inactive CB1 – G<sub>i</sub> protein complex, 2<sup>nd</sup> replica; (e) active CB1 – β-arrestin-2 complex, 1<sup>st</sup> replica; (f) active CB1 – β-arrestin-2 complex, 2<sup>nd</sup> replica; (g) inactive CB1 – β-arrestin-2 complex, 1<sup>st</sup> replica; (h) inactive CB1 – β-arrestin-2 complex, 2<sup>nd</sup> replica.



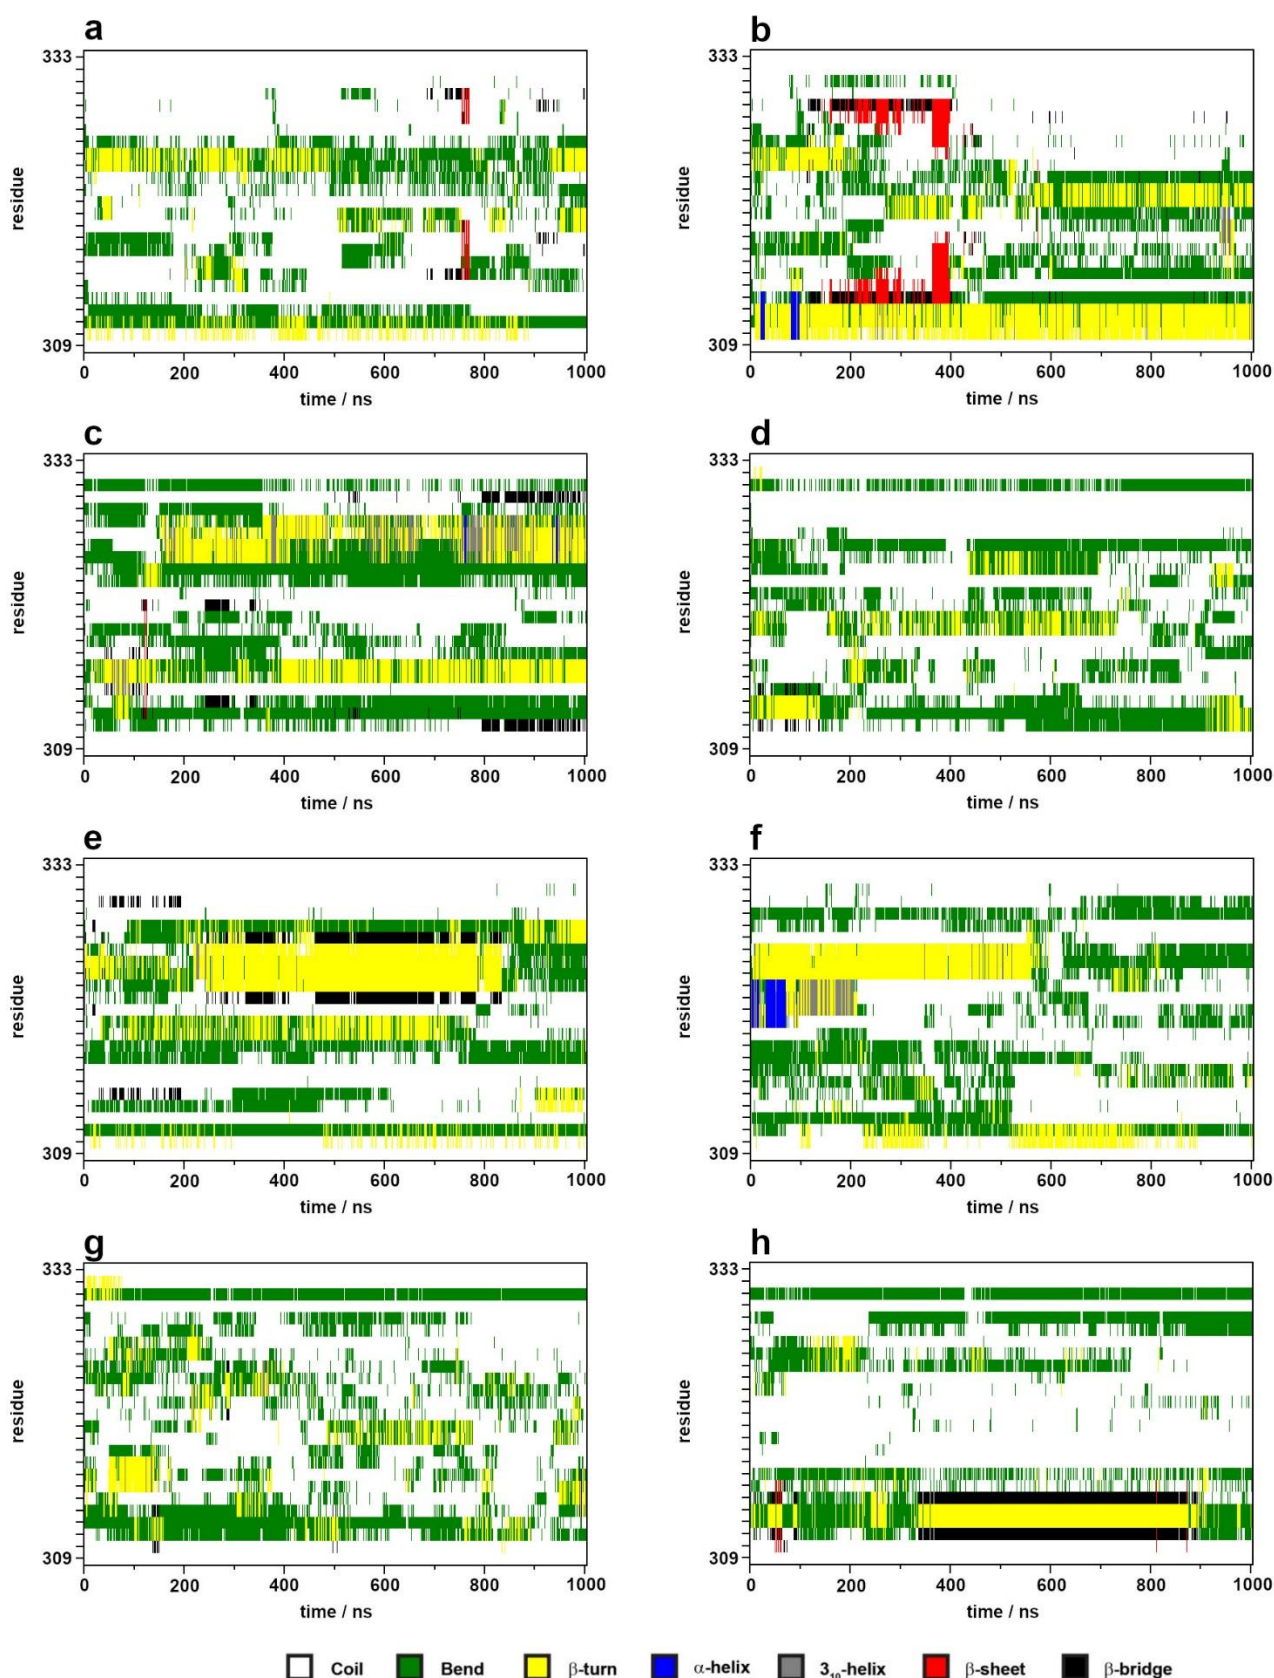

**Figure S8.** Evolution of the secondary structure of ICL3 during simulations. (a) active CB1 –  $G_i$  protein complex, 1<sup>st</sup> replica; (b) active CB1 –  $G_i$  protein complex, 2<sup>nd</sup> replica; (c) inactive CB1 –  $G_i$  protein complex, 1<sup>st</sup> replica; (d) inactive CB1 –  $G_i$  protein complex, 2<sup>nd</sup> replica; (e) active CB1 –  $\beta$ -arrestin-2 complex, 1<sup>st</sup> replica; (f) active CB1 –  $\beta$ -arrestin-2 complex, 2<sup>nd</sup> replica; (g) inactive CB1 –  $\beta$ -arrestin-2 complex, 1<sup>st</sup> replica; (h) inactive CB1 –  $\beta$ -arrestin-2 complex, 2<sup>nd</sup> replica.

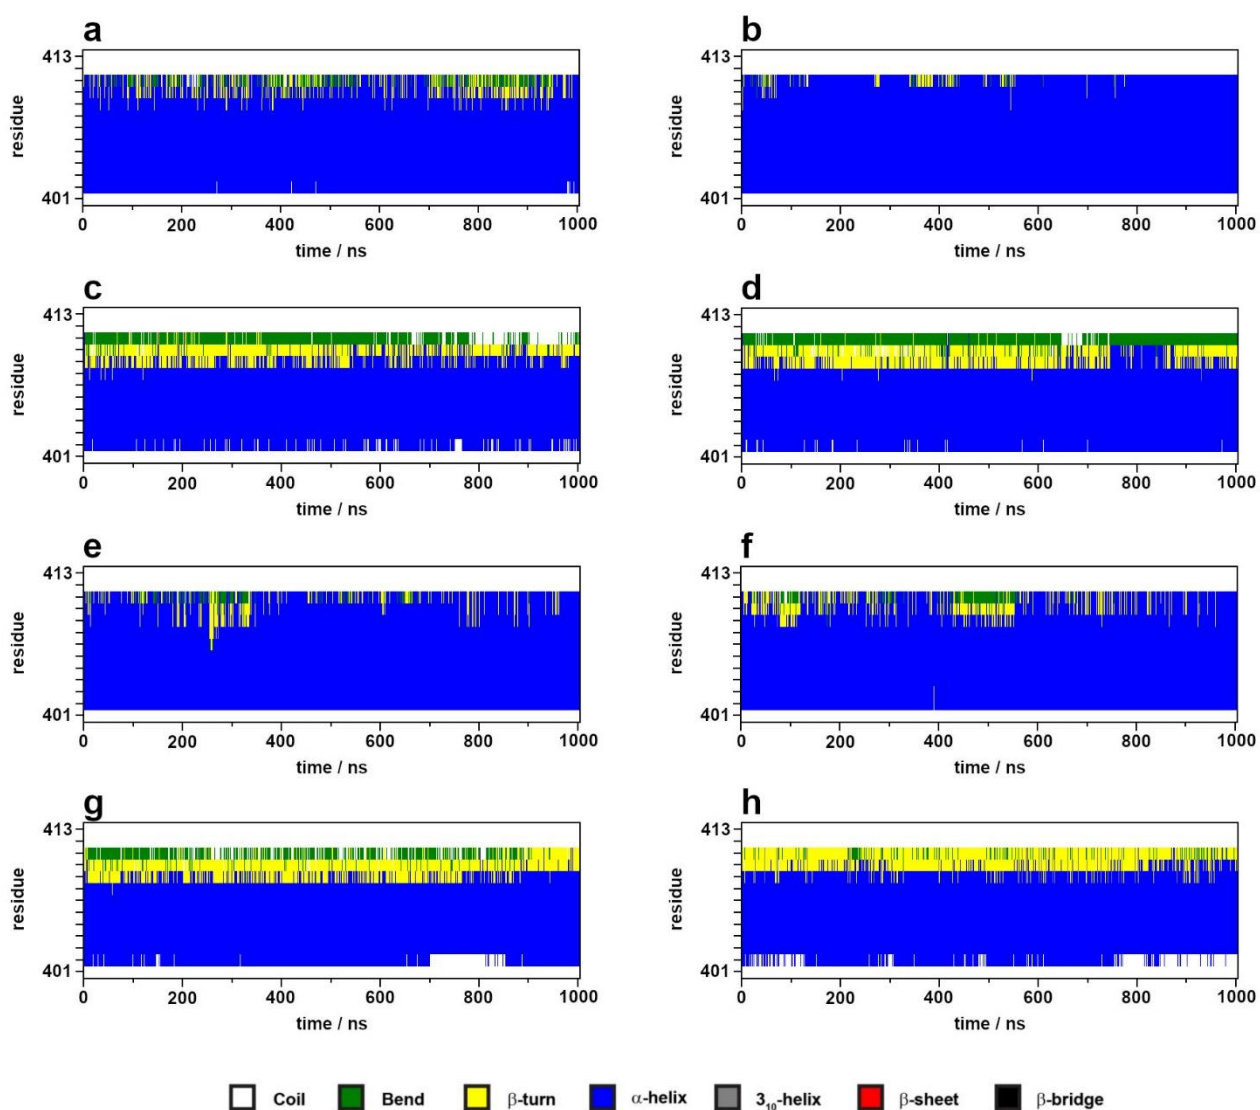

**Figure S9.** Evolution of the secondary structure of H8 during simulations. (a) active CB1 –  $G_i$  protein complex, 1<sup>st</sup> replica; (b) active CB1 –  $G_i$  protein complex, 2<sup>nd</sup> replica; (c) inactive CB1 –  $G_i$  protein complex, 1<sup>st</sup> replica; (d) inactive CB1 –  $G_i$  protein complex, 2<sup>nd</sup> replica; (e) active CB1 –  $\beta$ -arrestin-2 complex, 1<sup>st</sup> replica; (f) active CB1 –  $\beta$ -arrestin-2 complex, 2<sup>nd</sup> replica; (g) inactive CB1 –  $\beta$ -arrestin-2 complex, 1<sup>st</sup> replica; (h) inactive CB1 –  $\beta$ -arrestin-2 complex, 2<sup>nd</sup> replica.

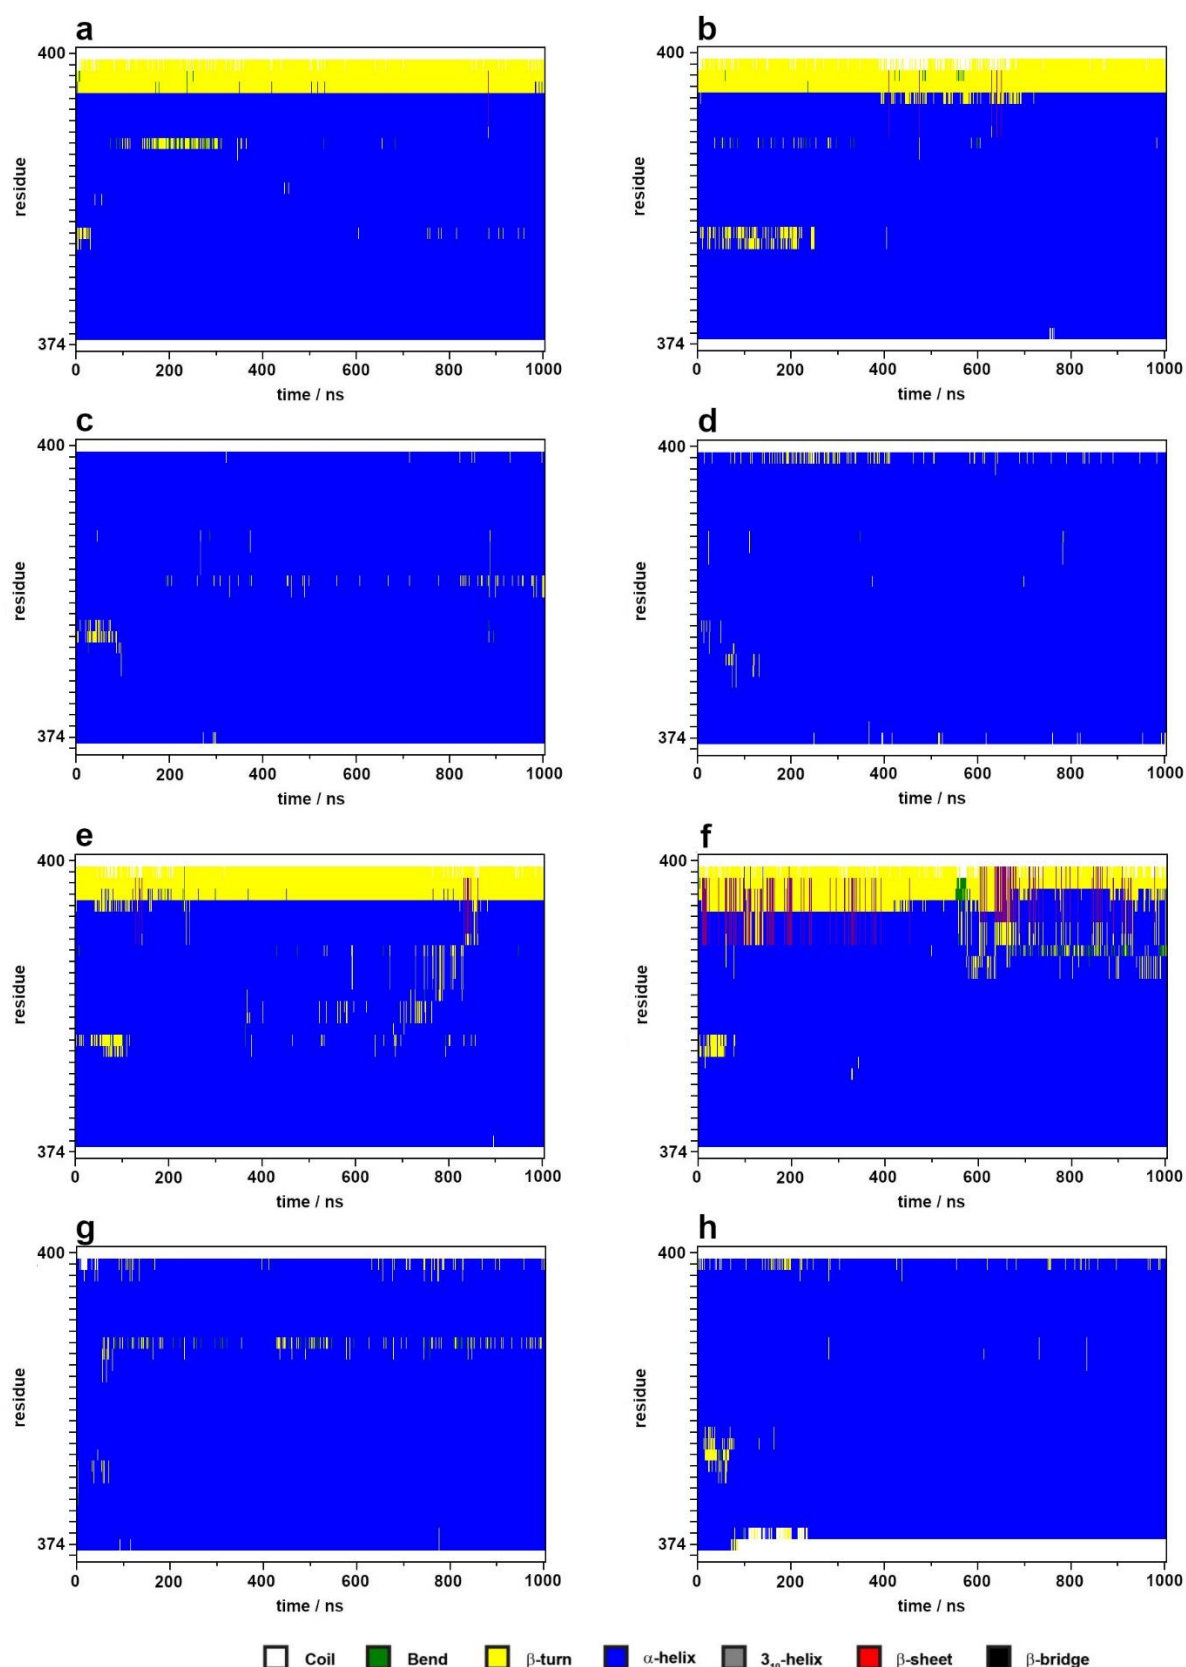

**Figure S10.** Evolution of the secondary structure of TM7 during simulations. (a) active CB1 –  $G_i$  protein complex, 1<sup>st</sup> replica; (b) active CB1 –  $G_i$  protein complex, 2<sup>nd</sup> replica; (c) inactive CB1 –  $G_i$  protein complex, 1<sup>st</sup> replica; (d) inactive CB1 –  $G_i$  protein complex, 2<sup>nd</sup> replica; (e) active CB1 –  $\beta$ -arrestin-2 complex, 1<sup>st</sup> replica; (f) active CB1 –  $\beta$ -arrestin-2 complex, 2<sup>nd</sup> replica; (g) inactive CB1 –  $\beta$ -arrestin-2 complex, 1<sup>st</sup> replica; (h) inactive CB1 –  $\beta$ -arrestin-2 complex, 2<sup>nd</sup> replica.



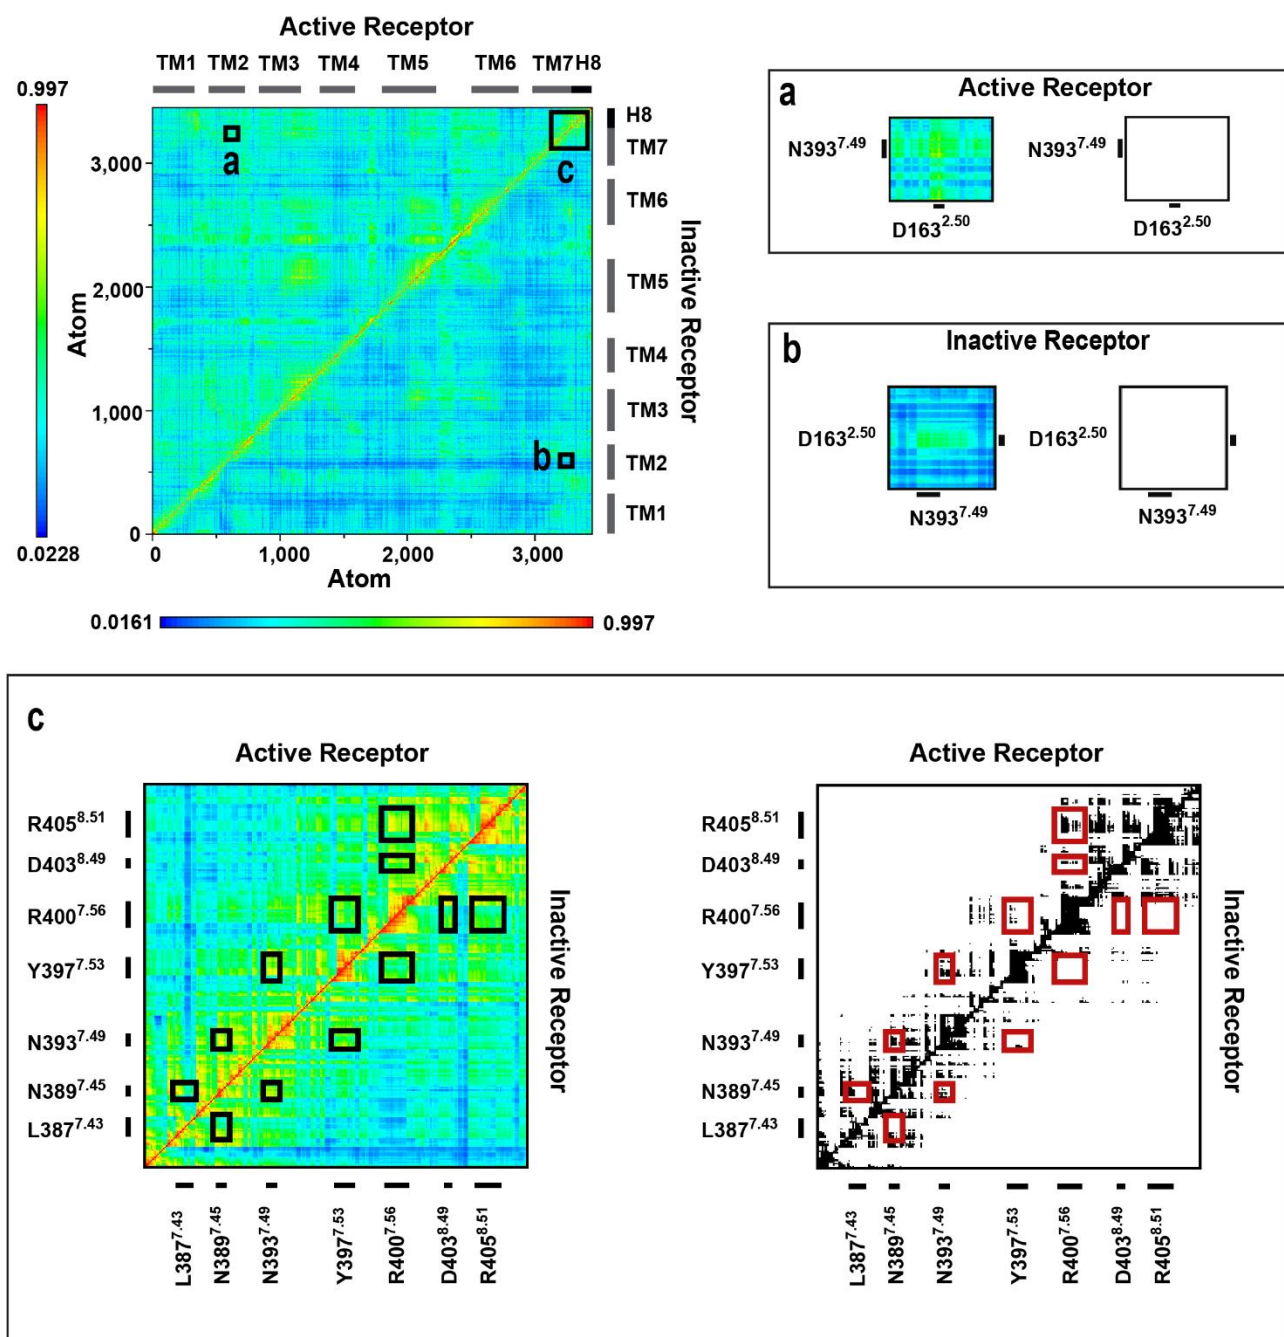

**Figure S11.** Cross-correlation matrices of the  $G_i$  protein-bound CB1 (2<sup>nd</sup> replica) in the active and inactive states. Panels (a-c) are magnified views of regions of amino acid residues of interest. Black and white panels show correlations above the threshold of 0.63 MI.

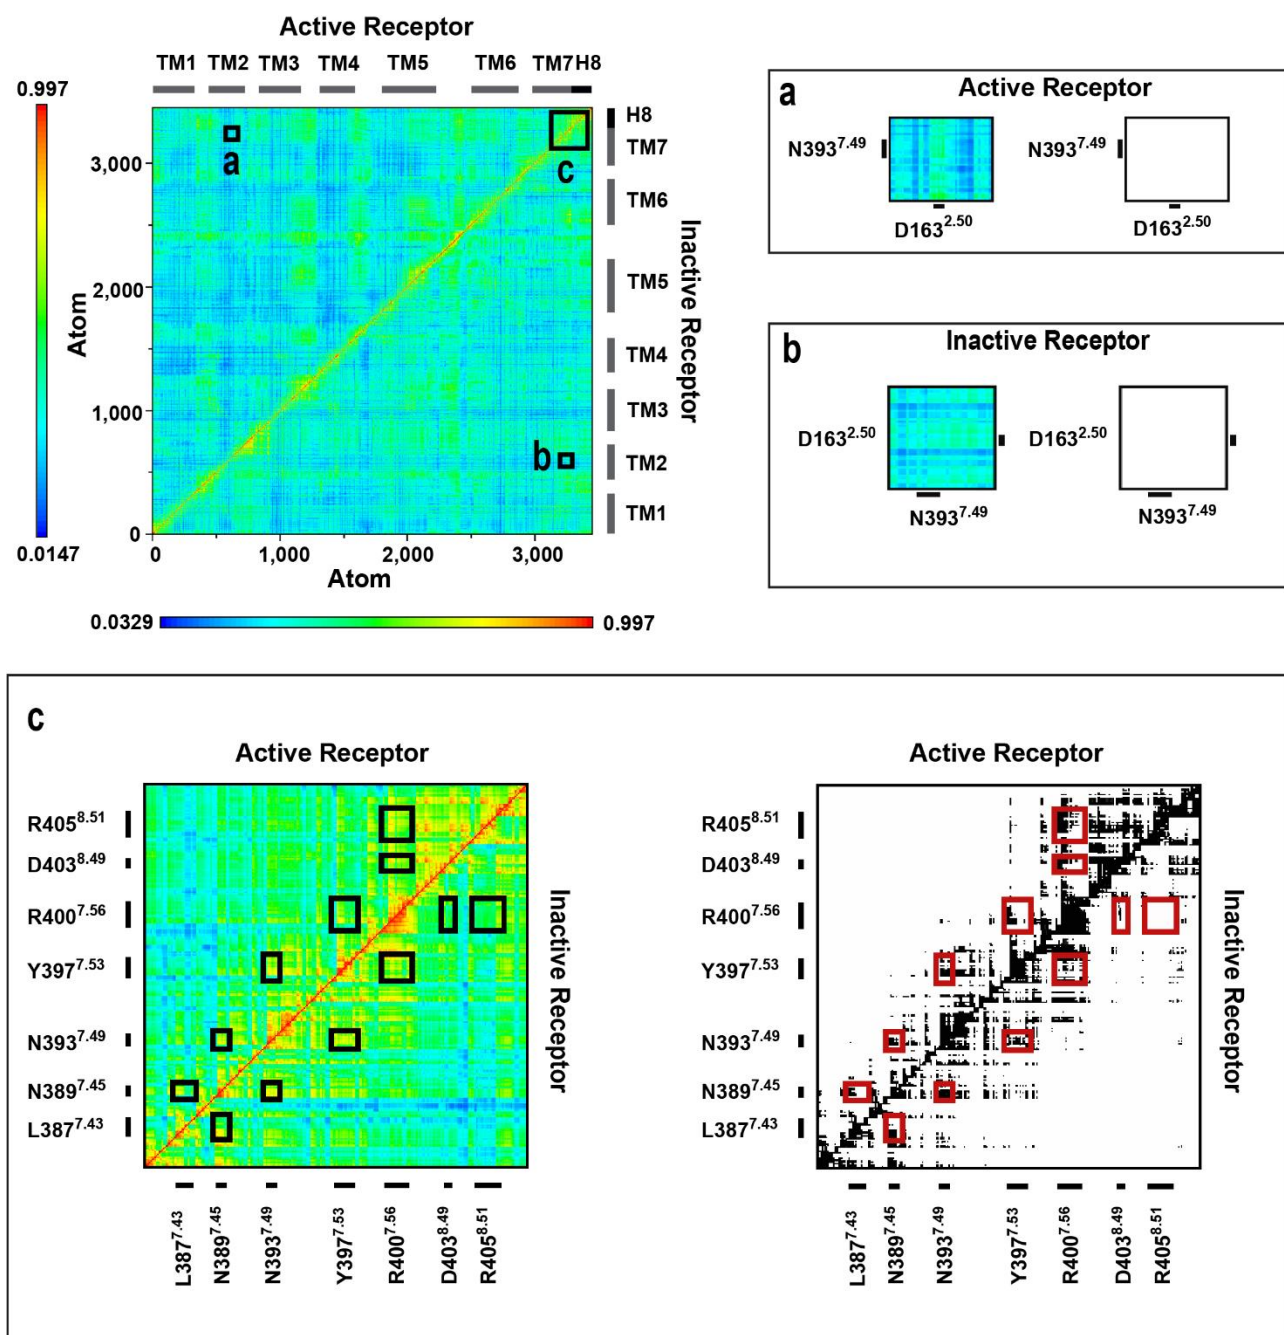

**Figure S12.** Cross-correlation matrices of the  $\beta$ -arrestin-2-bound CB1 (1<sup>st</sup> replica) in the active and inactive states. Panels (a-c) are magnified views of regions of amino acid residues of interest. Black and white panels show correlations above the threshold of 0.63 MI.

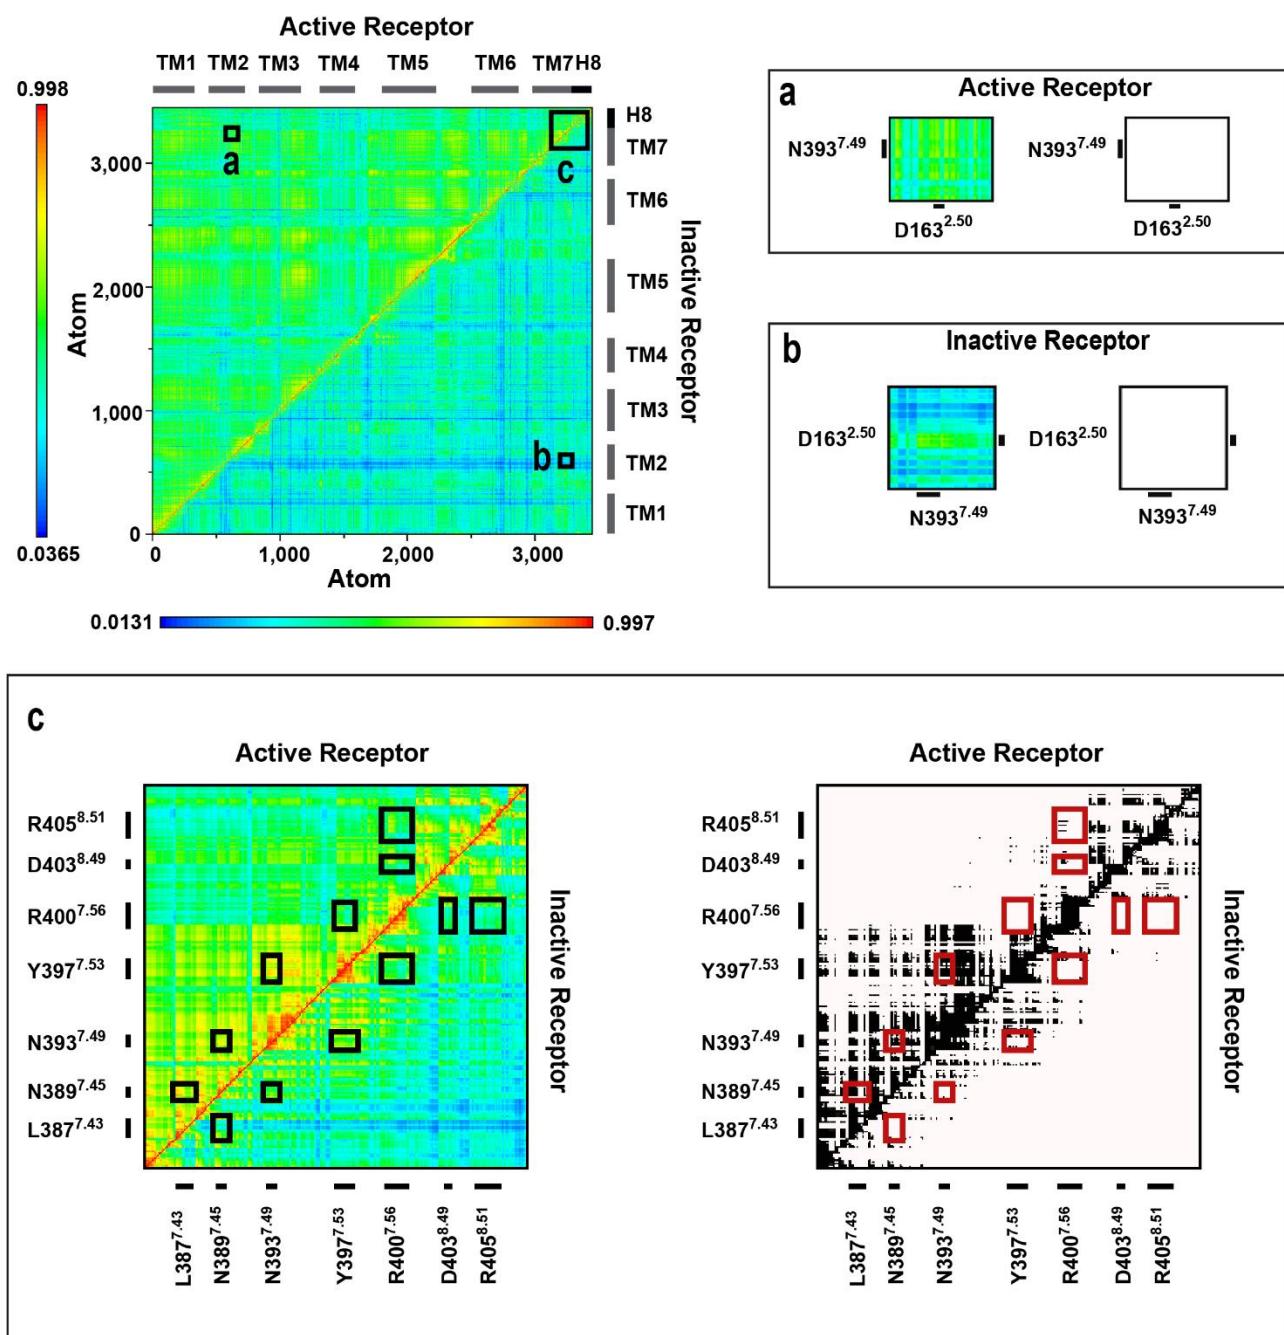

**Figure S13.** Cross-correlation matrices of the  $\beta$ -arrestin-2-bound CB1 (2<sup>nd</sup> replica) in the active and inactive states. Panels (a-c) are magnified views of regions of amino acid residues of interest. Black and white panels show correlations above the threshold of 0.63 MI.



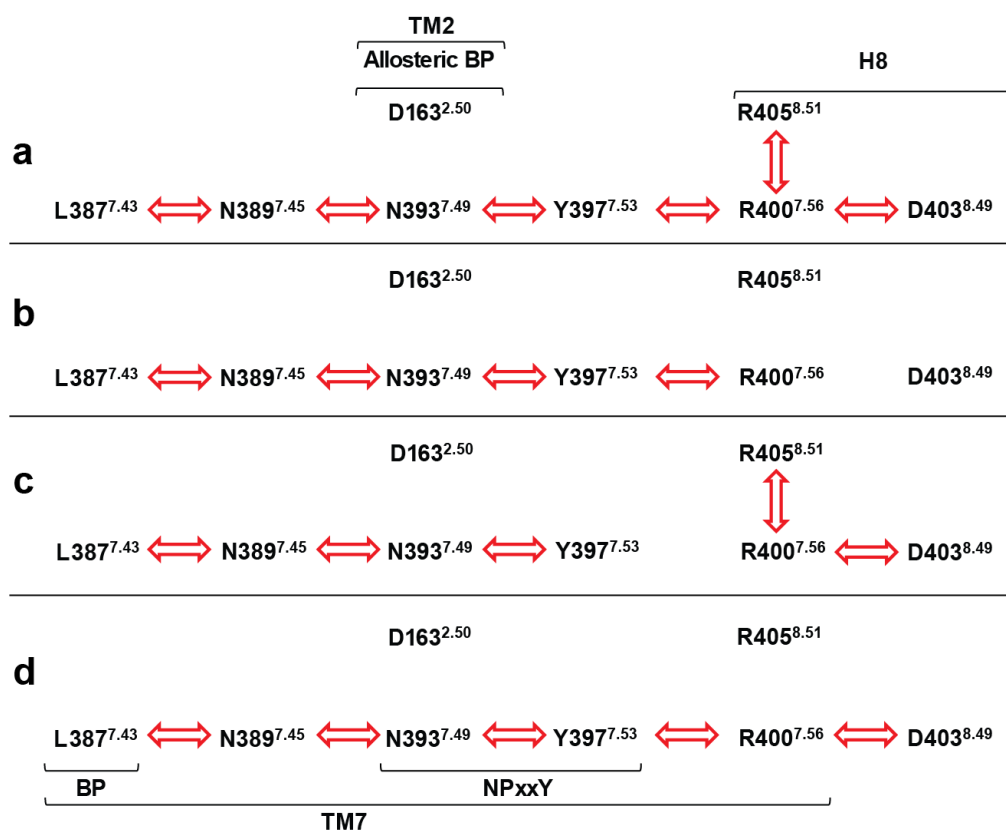

**Figure S14.** The polar signaling channel of the  $G_i$  protein or  $\beta$ -arrestin-2-bound CB1 indicated by cross correlation analysis. (a) active CB1 –  $G_i$  protein complex, 2<sup>nd</sup> replica; (b) inactive CB1 –  $G_i$  protein complex, 1<sup>st</sup> replica; (c) active CB1 –  $\beta$ -arrestin-2 complex, 2<sup>nd</sup> replica; (d) inactive CB1 –  $\beta$ -arrestin-2 complex, 1<sup>st</sup> replica. Red arrows indicate correlated motions of the respective amino acids.

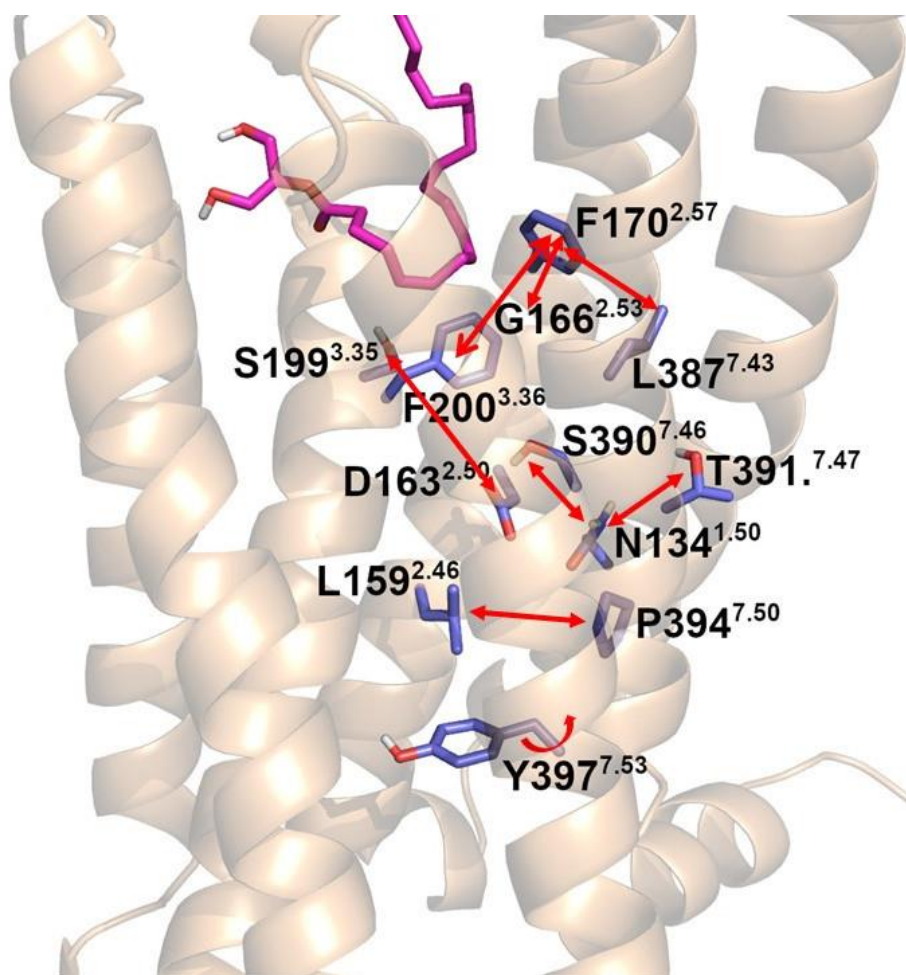

**Figure S15.** Residues and residue-residue pairs of which side chain conformations and distances were used, respectively, to characterize the two distinct structural states involved in G<sub>i</sub> protein and  $\beta$ -arrestin-2 mediated signaling. Straight red arrows indicate characteristic distances. The curved arrow shows the side chain dihedral angle involved in switching between the two active signaling states.

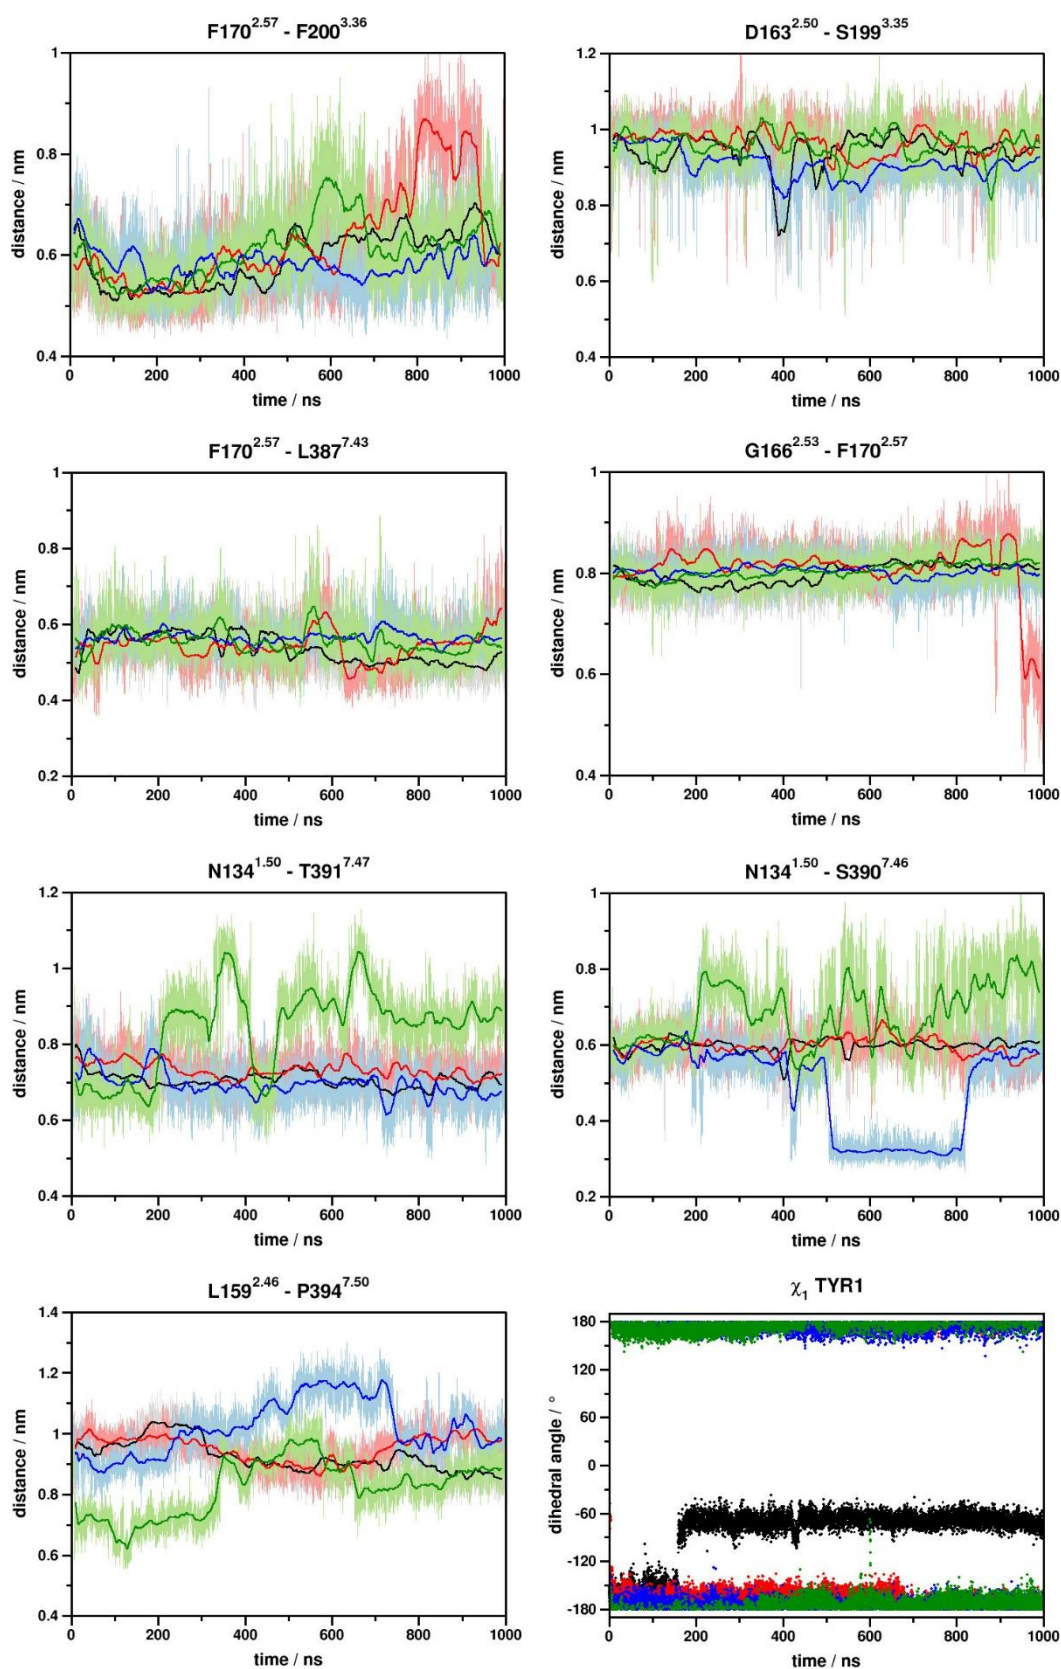

**Figure S16.** Evolution of specific residue-residue distances and side chain conformations associated with the two distinct structural states involved in G<sub>i</sub> protein and β-arrestin-2 mediated signaling. Black: active CB1 – G<sub>i</sub> protein complex, 1<sup>st</sup> replica; red: active CB1 – G<sub>i</sub> protein complex, 2<sup>nd</sup> replica; blue: active CB1 – β-arrestin-2 complex, 1<sup>st</sup> replica; green: active CB1 – β-arrestin-2 complex, 2<sup>nd</sup> replica.
